# Supplementary material
Source: Research Square preprint supplement (doi:10.21203/rs.3.rs-8922903/v1)

Supporting Information

**A Matrix-Targeting Enzyme and an Engineered Bioactive Gauze Enable Resistance-Agnostic Antibiofilm Wound Care**

Reshma Ramakrishnan,1 Kirti Parmar,2 Velpandi Ramachandran,1 Debmitra Sen,2 Raju S. Rajmani,3 Dipshikha Chakravortty2,4* and Debasis Das1*

Corresponding authors:

Prof. Debasis Das

Department of Inorganic and Physical Chemistry

Indian Institute of Science

Bangalore-560012, India

E-mail: [debasisdas@iisc.ac.in](mailto:debasisdas@iisc.ac.in)

Contact no: +91 8317865764

Prof. Dipshikha Chakravortty

Department of Microbiology and Cell Biology

Indian Institute of Science

Bangalore-560012, India

School of Biology

Indian Institute of Science Education and Research

Thiruvananthapuram, Kerala-695551, India

E-mail: [dipa@iisc.ac.in](mailto:dipa@iisc.ac.in)

Contact no: +91 802293-2842

| **Table of contents** | **Page No.** |
| --- | --- |
| Materials………………………………………………………………………………..… | S3 |
| Optimized DNA sequence and the protein sequence of CRhAB………...…………......... | S4-S5 |
| **Supplementary Figures 1-13**…...………………………………………………………. | S6-S19 |
| **Supplementary Tables 1-2**…….………………………………………………………... | S20-S21 |

**Materials**

Carboxymethyl cellulose (CMC, catalog no. C5678) was purchased from Sigma-Aldrich, USA. Amylose (catalog no. YA10257), *p*-nitrophenyl-*α*-D-maltohexoside (catalog no. EN06814), *p*-nitrophenyl-*β*-D-xylopyranoside (catalog no. EN03230), and *p*-nitrophenyl-*β*-D-glucuronide (catalog no. EN04823) were obtained from Biosynth Carbosynth, UK. *p*-nitrophenyl-*β*-D-glucopyranoside (catalog no. 92734), *p*-nitrophenyl-*β*-D-galactopyranoside (catalog no. 96226), *p*-nitrophenyl-*α*-D-glucopyranoside (catalog no. 12735), *p*-nitrophenyl-*α*-D-galactopyranoside (catalog no. 64685), and sodium alginate (catalog no. 52775), of purest commercial grade, were obtained from SRL, India. Galactomannan (CAROB, catalog no. 11078-30-1) was purchased from Megazyme, Australia. Kanamycin (catalog no. 02199853-CF), lysozyme (catalog no. 02100831-CF), α-amylase (from Bacillus subtilis, catalog no. 02100447), and cellulase (from Aspergillus niger, catalog no. 02150583) were purchased from MP Biomedical, USA. DNaseI (catalog no. RC1072) was obtained from G-Bioscience, USA. All buffers and salts of the purest commercial grades were obtained from SRL, India. DMEM (catalog no. 12-604Q), FBS (catalog no. Gibco A4766801), Ly-6G monoclonal antibody (catalog no. 16-9668-82), and F4/80 monoclonal antibody conjugated with Alexa Fluor 488 (catalog no. 53-4801-82) were purchased from Thermo Fisher Scientific, USA. MTT (catalog no. M3297), glutaraldehyde (catalog no. G0068), and 3,5-dinitrosalicylic acid (catalog no. D0850) were purchased from TCI, Japan. Syto 9 and propidium iodide were purchased from Invitrogen, USA. For bacterial culture, Lysogeny broth (LB, catalog no. M1245), TSB (catalog no. M011-500G), agar (catalog no. RM301), and C.L.E.D. agar w/bromo thymol blue (catalog no. M792-500G) were procured from HiMedia, India. Ni-NTA resin (Nuvia™ IMAC Resin, Bio-Rad, catalog no. 7800801) was purchased from Bio-Rad, USA. 96-well and 24-well transparent plates were purchased from Nunc, Denmark, and 96-well black plates were purchased from Thermo Fisher, USA. Medical gauze (5 cm X 5 cm SOFTSWAB®, code: 112405), endotracheal tube (Romsons® GS-2004, 9 mm), silicon Foley catheter (SILKO-CATH®, GS-1078), and latex Foley catheter (Teleflex® latex Foley balloon catheter, code: 180630) were purchased from a medical pharmacy in India. All the other chemicals and biochemicals were of the highest available commercial grades.

**Optimized DNA sequence and the protein sequence of CRhAB**

**DNA sequence:**

ATGGGTCATCACCATCATCATCACGGGTCCCTGCAGGACTCAGAAGTCAATCAAGAAGCTAAGCCAGAGGTCAAGCCAGAAGTCAAGCCTGAGACTCACATCAATTTAAAGGTGTCCGATGGATCTTCAGAGATCTTCTTCAAGATCAAAAAGACCACTCCTTTAAGAAGGCTGATGGAAGCGTTCGCTAAAAGACAGGGTAAGGAAATGGACTCCTTAAGATTCTTGTACGACGGTATTAGAATTCAAGCTGATCAGGCCCCTGAAGATTTGGACATGGAGGATAACGATATTATTGAGGCTCACCGCGAACAGATTGGAGGTTCTGGCTCTGGGATGAAGCGTAAAAGCATCATTAGCGTTCTGTTCATCTTTCTGCTGGTGCTGGCGGGTTGCAGCAGCAGCAAGGTTAAACTGCCGGCGCAGAGCGAGGTGACCGACAAGACCCTGAAAGATGTTTTCGCGGAACACGGTATGAAAGTGGGCACCTGCATTAGCAGCCAGGTTACCAAGAAAACCGCGACCAGCGACCTGATGGTGACCCAATTTTGCAGCTGCACCATGGAGAACGCGATGAAACCGGACTACATCCTGGATCAGGCGCAAAGCCGTAGCAGCGGCAAGCCGATTGTTAAATTCAACAGCGAAGCGCTGAGCCTGATGAGCTGGGCGAAGAAAAACAGCTTTAGCATGCGTGGCCACACCATGATCTGGCACAGCCAGACCCCGGATTGGCTGTTCCGTGAGGATTTTGACCCGCGTGGTAGCTACGTGGGCCGTGAGGAAATGCTGAGCCGTATGGAAGCGCTGATCCGTGGTGTTTTCGAGGAACTGAAGGCGCAAGGCTATATTGACCTGTTTTACGCGTATGATGTGGTTAACGAGGCGTGGATGGAAGACGGTAGCATGCGTGATAGCAACTGGCGTCGTATCATTGGCGACGATTACCTGTGGTATGCGTTCTACTATGCGGACAAATACGCGCCGGAAACCATCGACCTGTACTATAACGATTACAACGAACAGTATAAGGCGGACAGCATTGCGGCGTTCGTGGATACCCTGAAAGACGATGACGGTCGTAGCCTGATCGACGGTATTGGCCTGCAAGCGCACCTGTTTACCGCGGATGACGTTAACACCTACCTGGAGGGTGTGGATATCCTGGCGGAAACCGGCCTGAAGCTGGAGCTGACCGAAGTGGACGTTGGTCTGGGCAAATATGAGGGTGCGCTGACCAACACCGATGCGAACCTGAAGATGCAGGGCCGTTACTGCTATGAGCTGTTCCAAGGTCTGTTTGAACGTGTGGACGCGGGCAAAGTTCGTATGGATGCGGTGACCTTCTGGGGTTTTAGCGACGGCTTTAGCTGGCGTCGTGAATACAGCCCGCAGCTGTATGATAGCGACCTGGATCCGAAGTACGCGCTGTATGGTGTTATGCAAATTAAAGAGTACGCGGGCTATGATCCGGCGGAATAA

**Protein sequence (His tag-Sumo tag-Linker-CRhAB):**

MGHHHHHHGSLQDSEVNQEAKPEVKPEVKPETHINLKVSDGSSEIFFKIKKTTPLRRLMEAFAKRQGKEMDSLRFLYDGIRIQADQAPEDLDMEDNDIIEAHREQIGGSGSGMKRKSIISVLFIFLLVLAGCSSSKVKLPAQSEVTDKTLKDVFAEHGMKVGTCISSQVTKKTATSDLMVTQFCSCTMENAMKPDYILDQAQSRSSGKPIVKFNSEALSLMSWAKKNSFSMRGHTMIWHSQTPDWLFREDFDPRGSYVGREEMLSRMEALIRGVFEELKAQGYIDLFYAYDVVNEAWMEDGSMRDSNWRRIIGDDYLWYAFYYADKYAPETIDLYYNDYNEQYKADSIAAFVDTLKDDDGRSLIDGIGLQAHLFTADDVNTYLEGVDILAETGLKLELTEVDVGLGKYEGALTNTDANLKMQGRYCYELFQGLFERVDAGKVRMDAVTFWGFSDGFSWRREYSPQLYDSDLDPKYALYGVMQIKEYAGYDPAE

**Supplementary Figures**

**
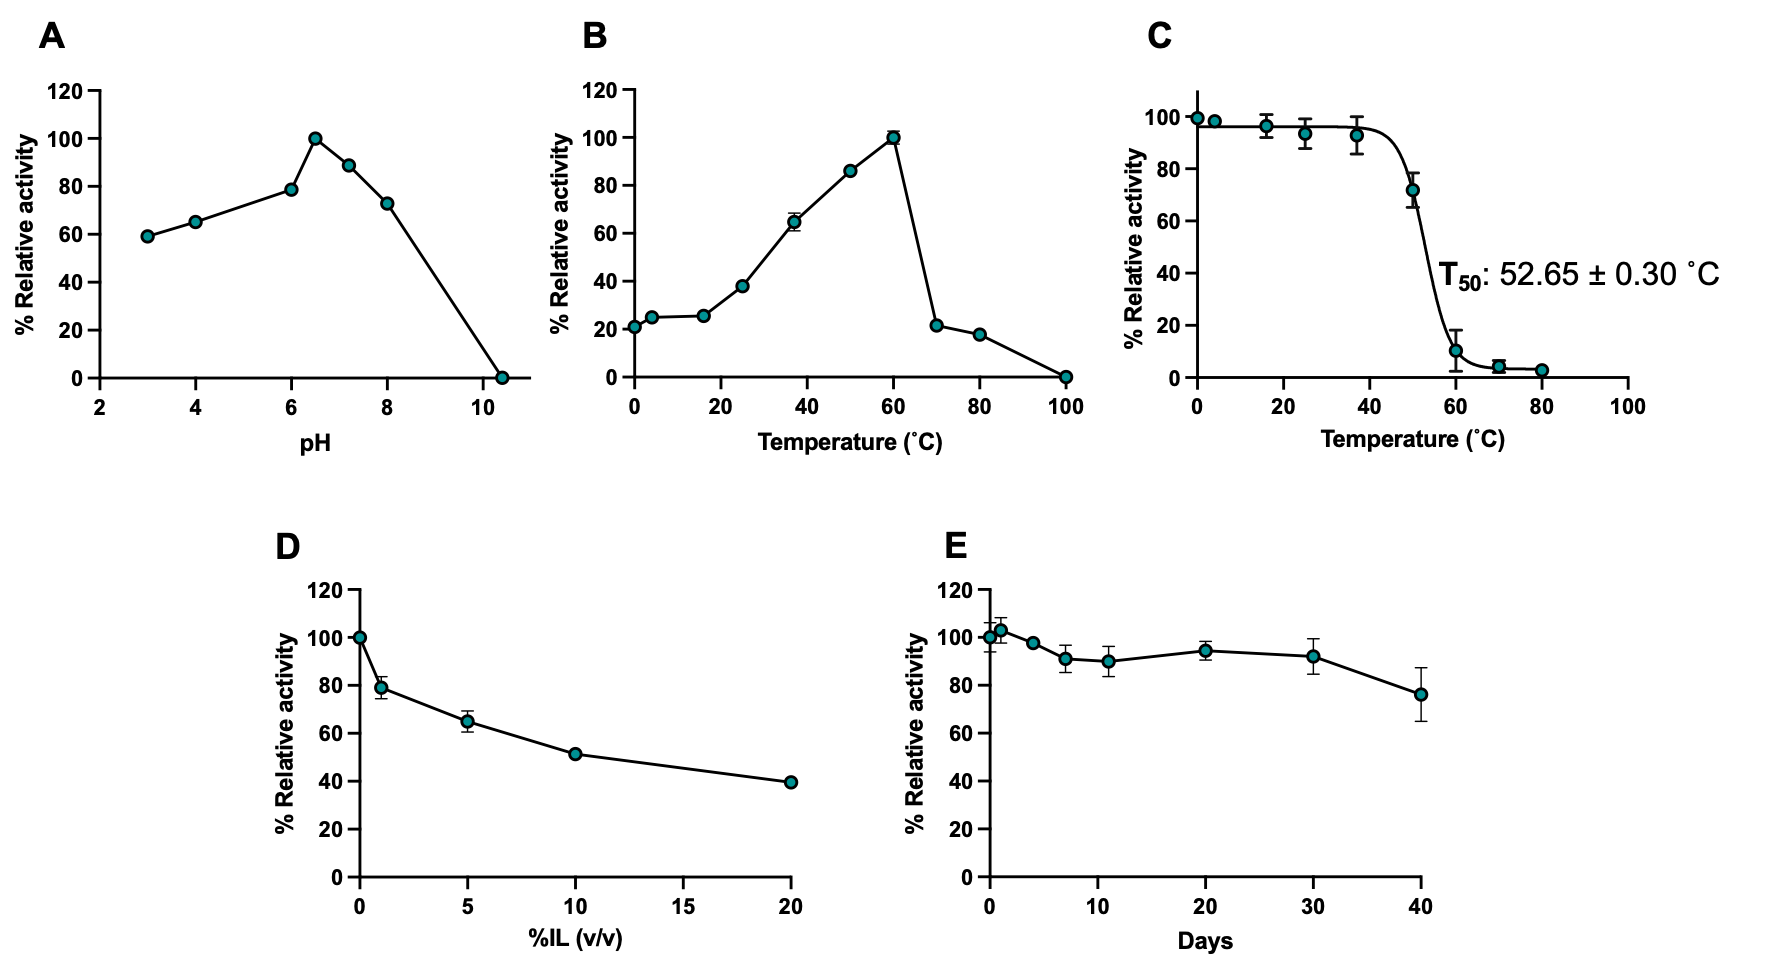
**

**Supplementary Figure 1.** **Biochemical characterization of CRhAB.** **(A)** Relative activity of CRhAB at different pHs. **(B)** Relative activity of CRhAB at different temperatures. **(C)** Thermal stability measurement of CRhAB. **(D)** Relative activity of CRhAB at different concentrations of the ionic liquid 1-ethyl-3-methylimidazolium acetate. **(E)** Relative activity of CRhAB as a function of time monitored till 40 days at 37 °C. Maximum activity is defined as 100%. All experiments were performed in triplicate (n = 3). Error bars correspond to mean ± standard deviation (SD).


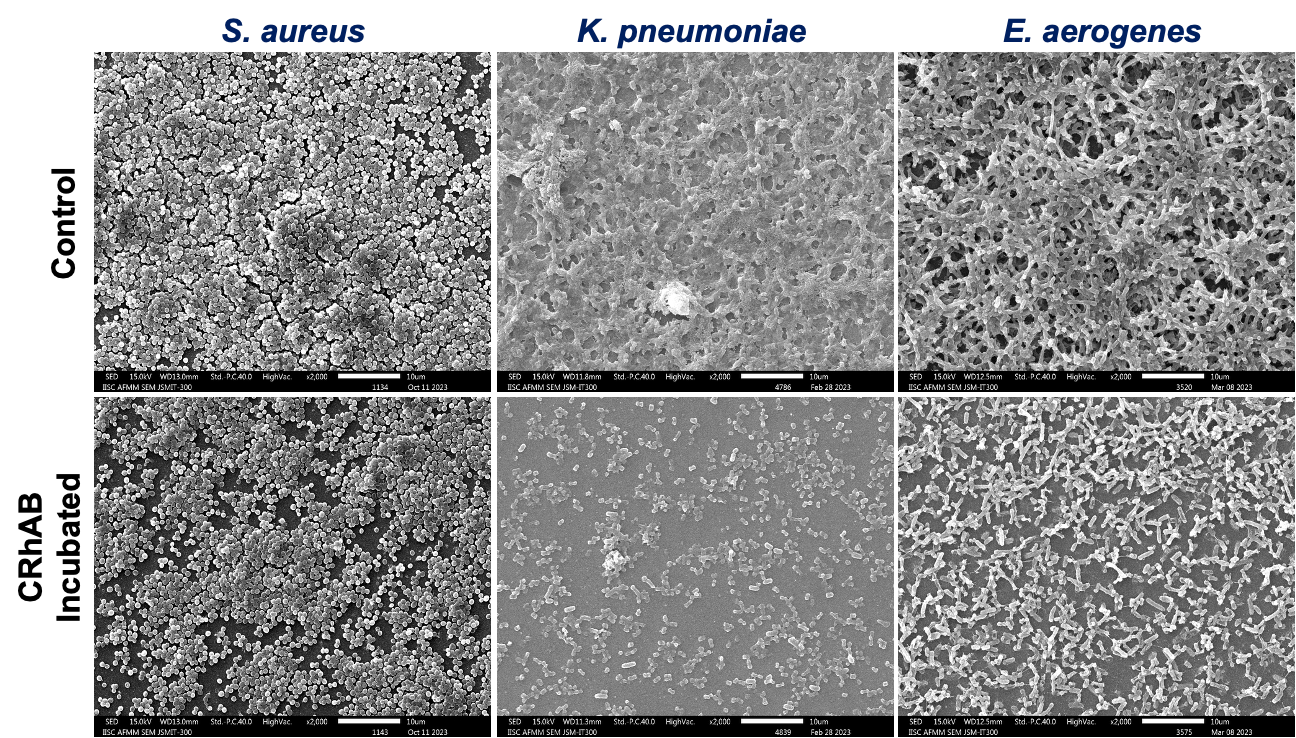


**Supplementary Figure 2.** Scanning electron micrographs of biofilms of various ESKAPE pathogens on glass coverslips without (control) and with the incubation of CRhAB (10 µM at 37 °C for 3 days, under static conditions). All experiments were performed in triplicate (n = 3), and representative images are shown, scale bar: 10 µm.


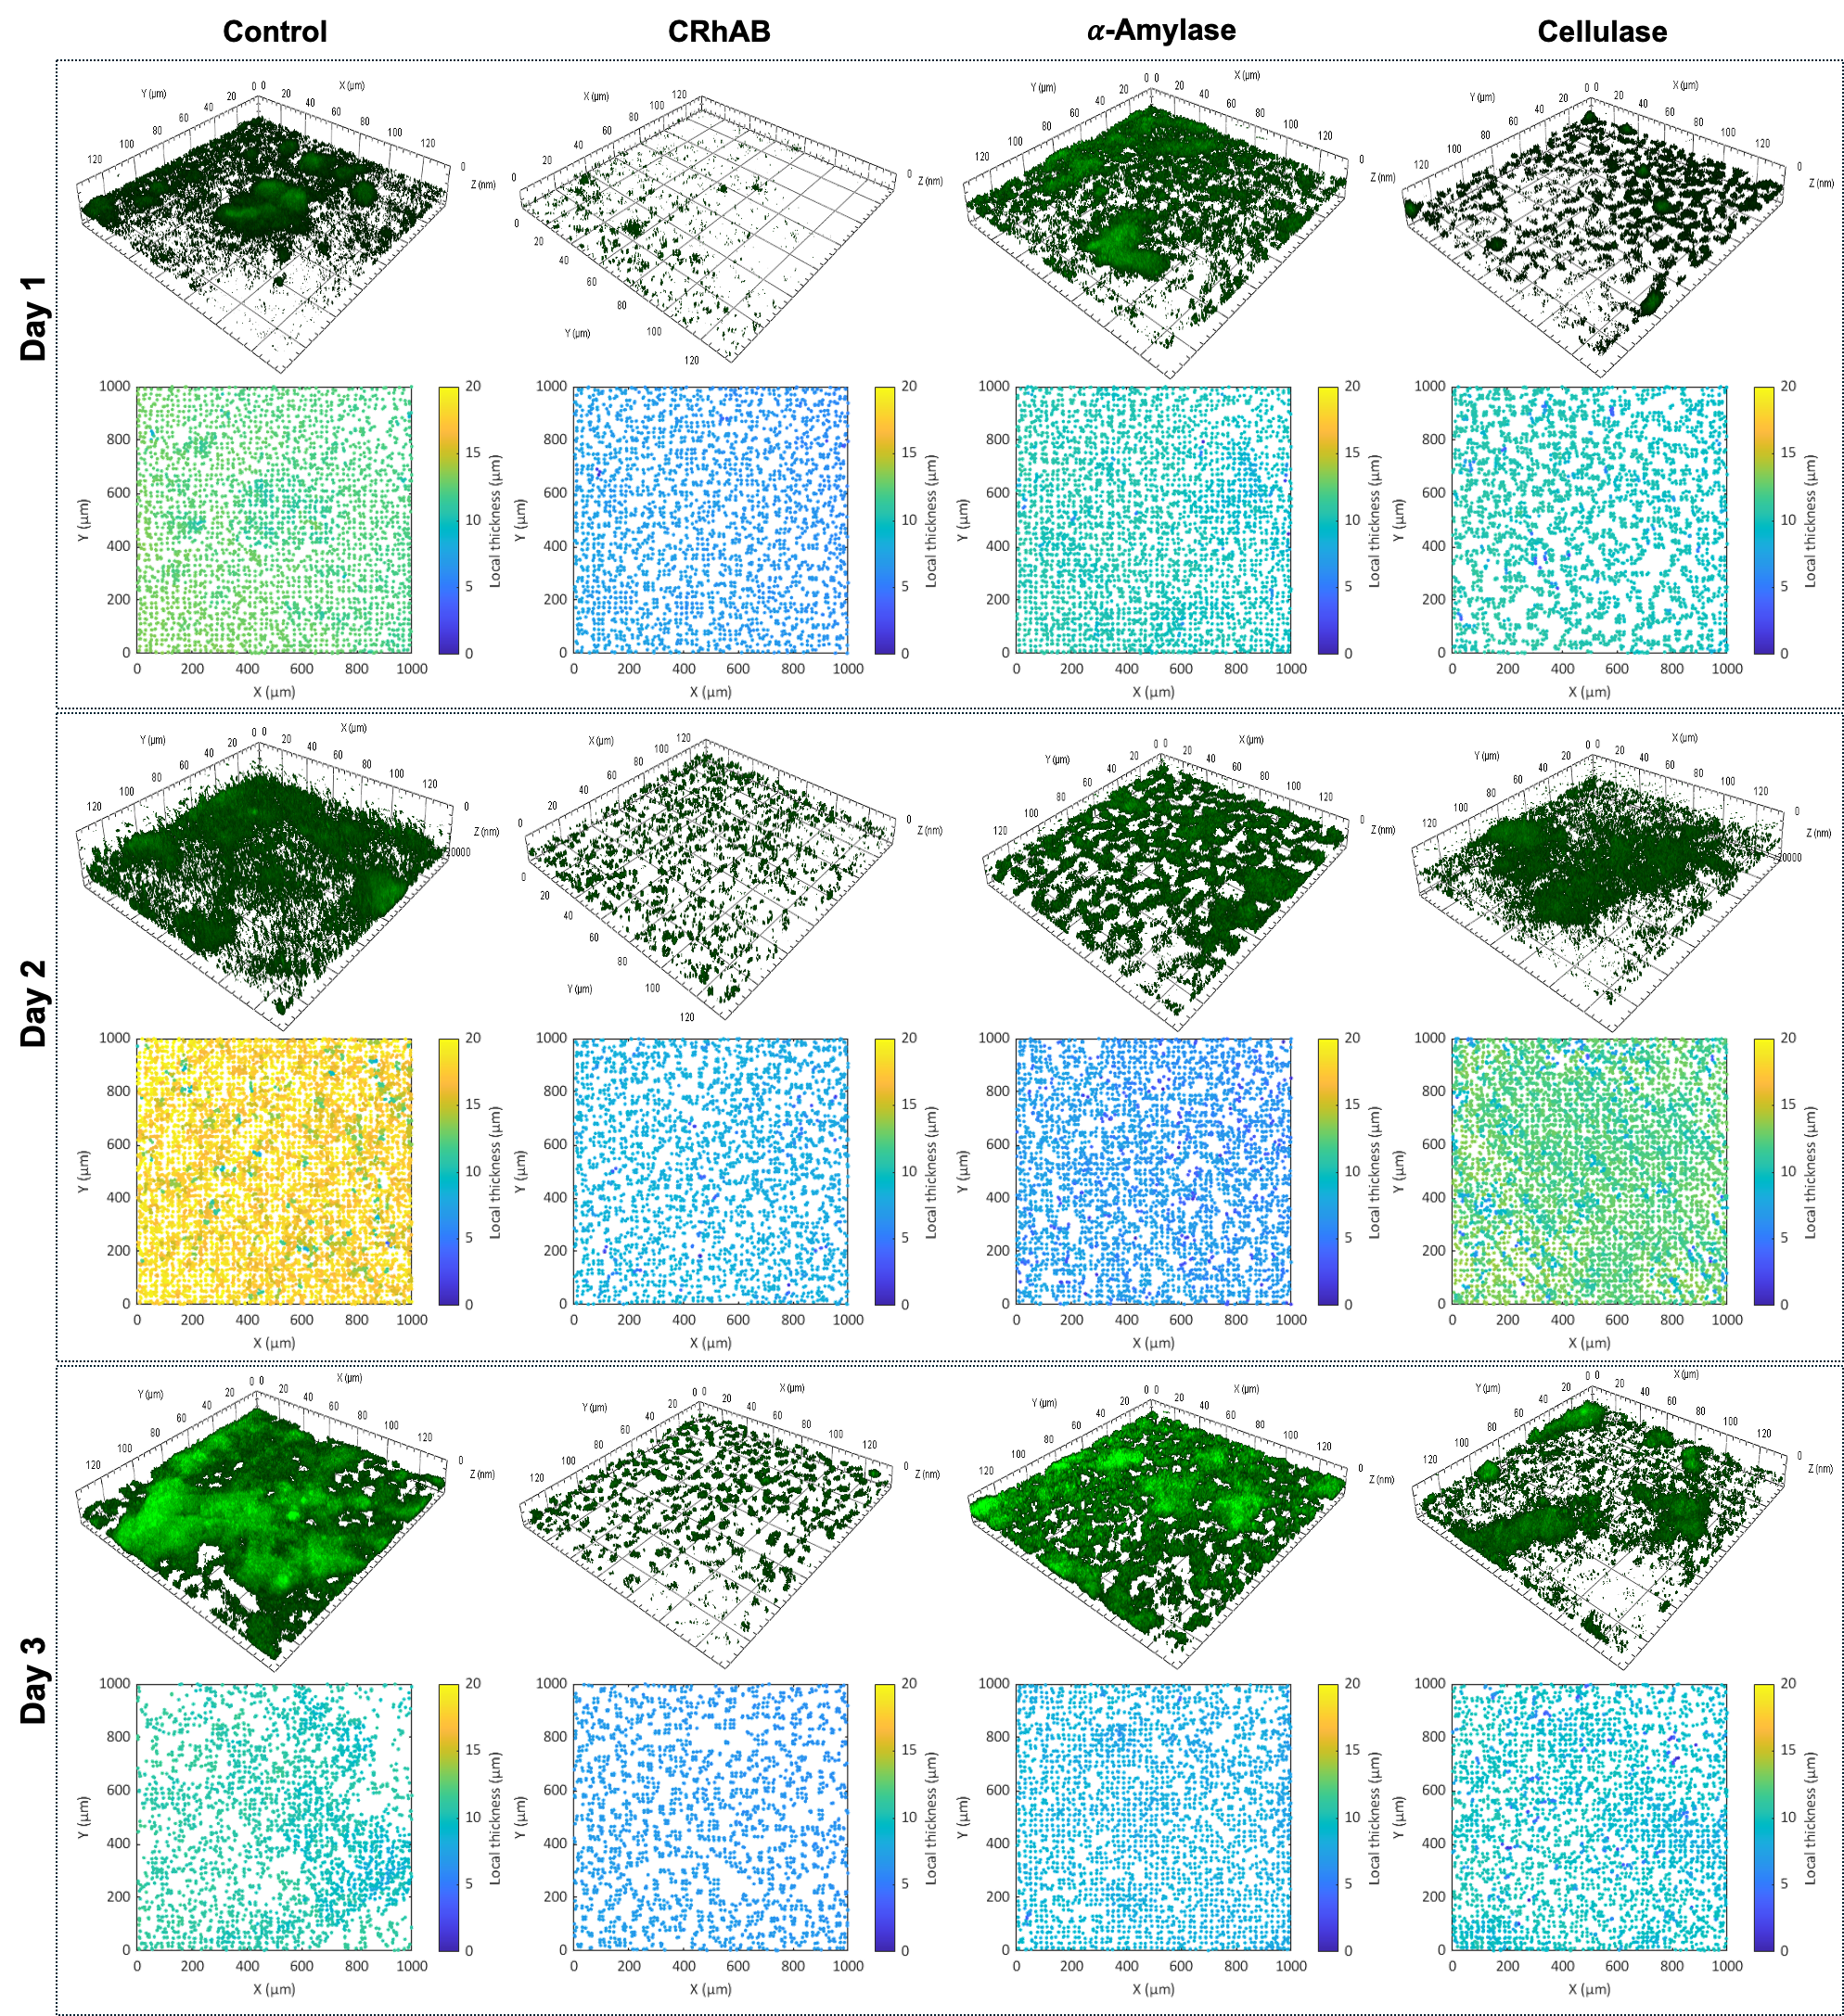


**Supplementary Figure 3.** CRhAB inhibits *A. baumannii* biofilm formation. 3D representative CLSM images of SYTO 9-stained *A. baumannii* biofilm. The *A. baumannii* biofilm was grown with CRhAB (0.5 mg/mL), 𝛼-amylase (5 mg/mL), and cellulase (5 mg/mL) over 3 days at 37 °C. Confocal z-stack images were analysed via BiofilmQ software, and the local biofilm thickness was represented as scattered colour to obtain a 2D+colour scattered plot.


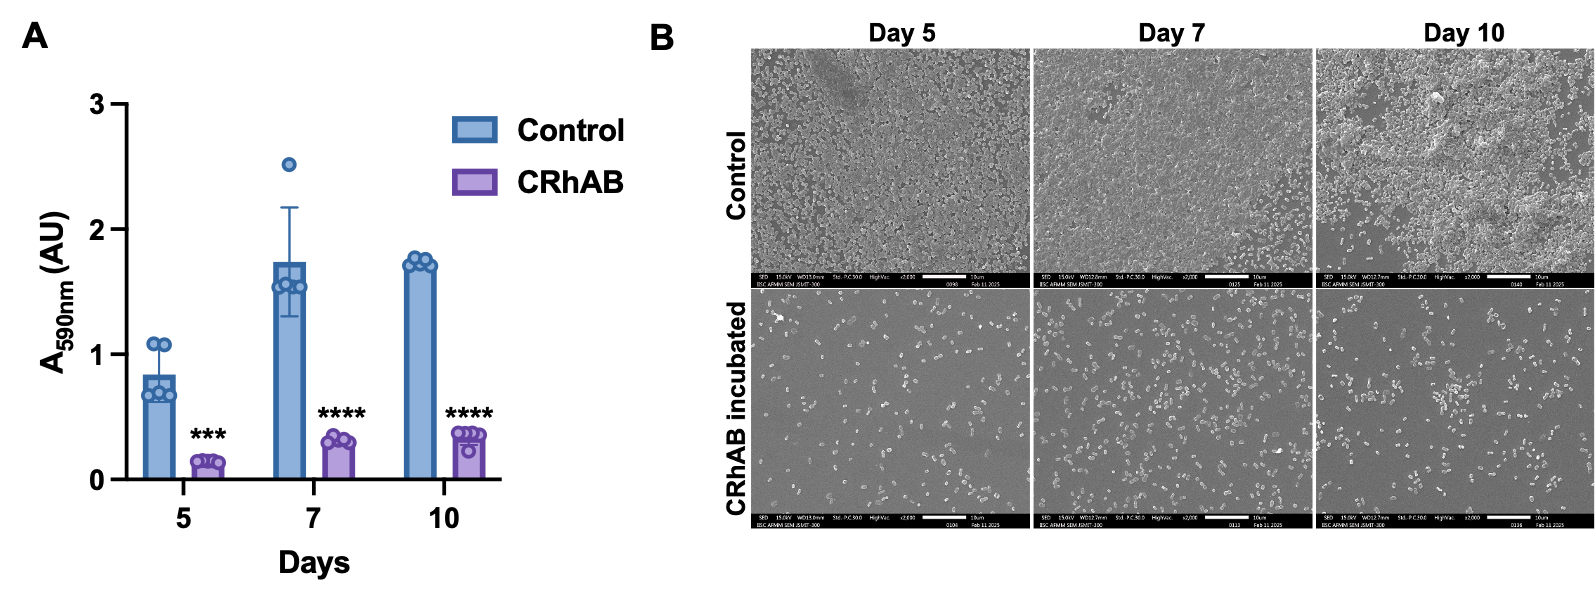


**Supplementary Figure 4.** **Inhibition of *A. baumannii* biofilm formation by CRhAB up to 10 days.** **(A)** Quantification of *A. baumannii* biofilm formed on a glass coverslip in the presence and absence of CRhAB (10 µM) at 37 °C by crystal violet staining, n=5. **(B)** Representative corresponding SEM images, scale bar: 10 µm. Two-way ANOVA followed by Tukey's multiple comparisons test was used to determine the statistical significance of the experimental data. The error bar indicates the mean ± standard deviation. Statistical difference was denoted with asterisks, and **** and *** denote the *p*-value <0.0001, <0.001, respectively.

**
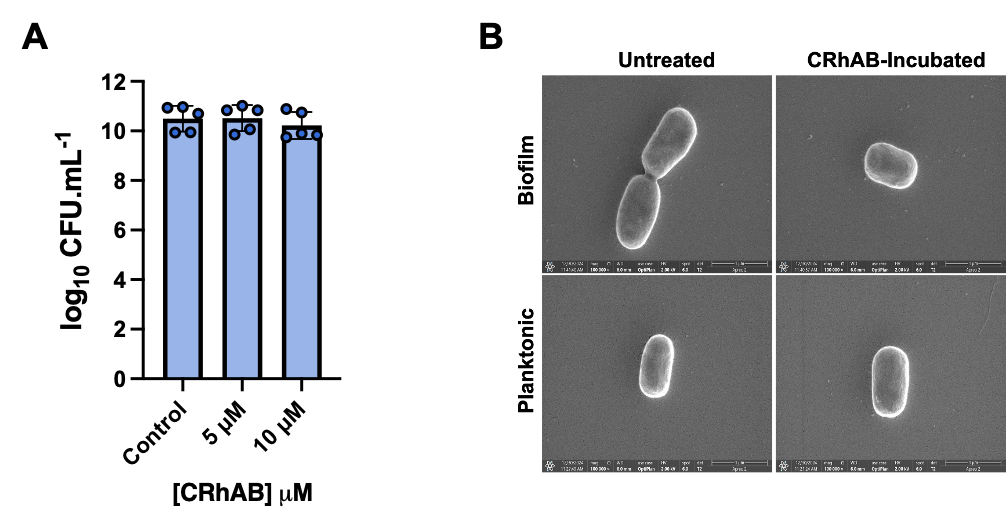
**

**Supplementary Figure 5.** **CRhAB does not affect *A. baumannii* cells.(A)** Number of viable cells at the endpoint of the growth curve, n=5. **(B)** Effect of CRhAB (10 µM) on *A. baumannii* cells in biofilm and on planktonic cells analysed by SEM, scale bar: 1 µm.


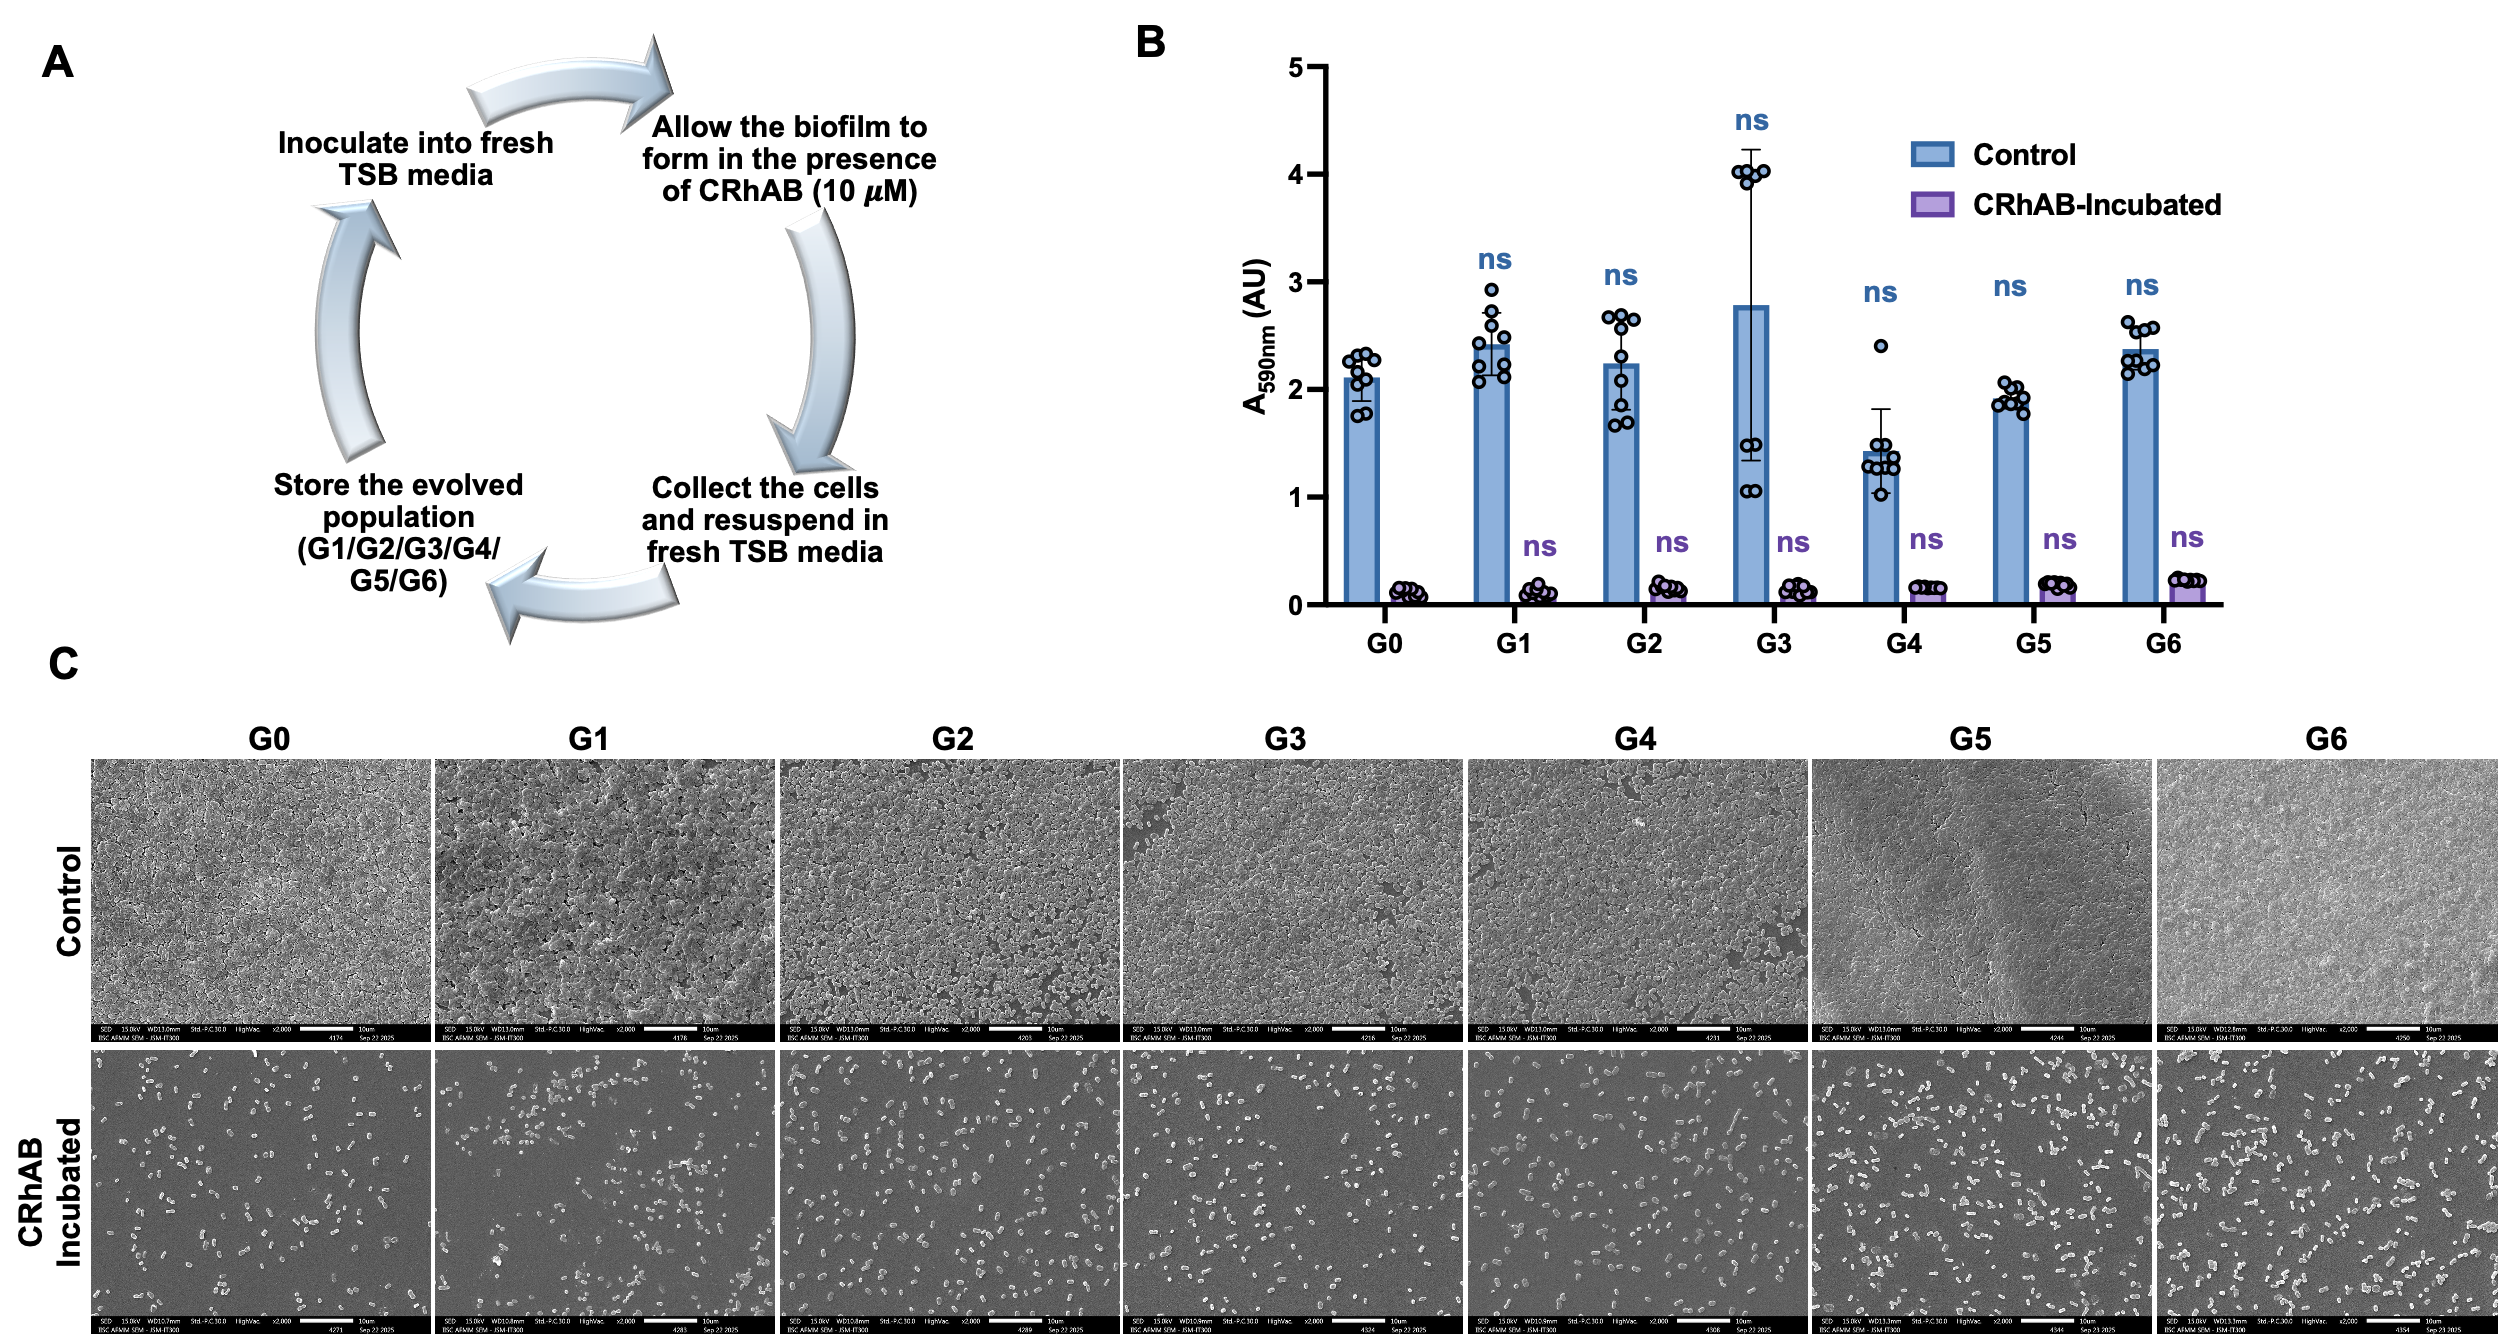


**Supplementary Figure 6.** **(A)** Schematic representation of the evolution experiment. **(B)** Quantification of biofilm formation (at 37 °C, over 3 days) by evolved populations (G0-G6) on a glass coverslip in the presence and absence of CRhAB (10 µM) by crystal violet staining, n=3, N=3. **(C)** Corresponding representative SEM images, scale bar: 10 µm. The error bars correspond to the standard deviation (SD) of n = 9. Two-way ANOVA followed by Tukey's multiple comparisons test was used to determine the statistical significance of the experimental data **(B)**, ns: non-significant.


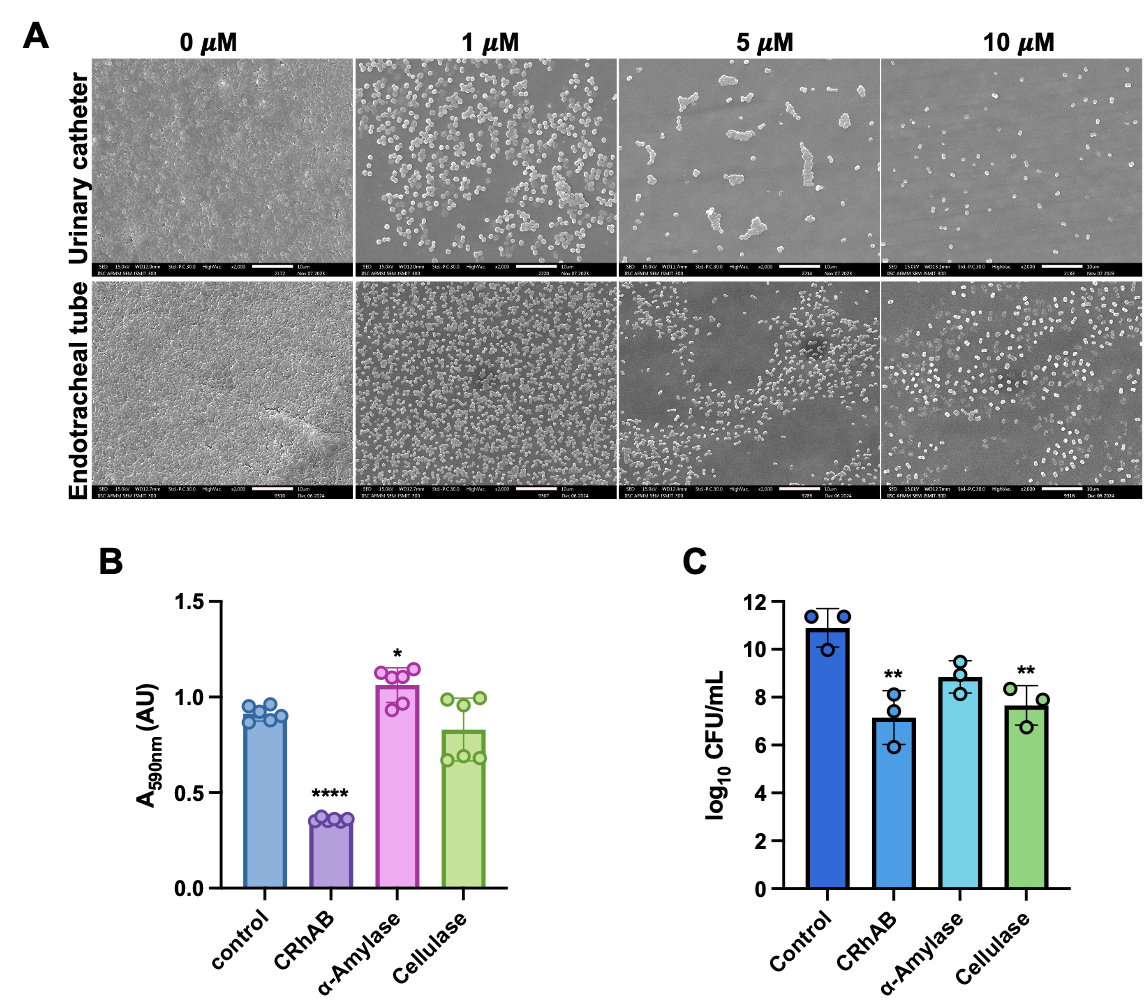


**Supplementary Figure 7.** **Inhibition of *A. baumannii* biofilm formation on catheter and endotracheal tube by CRhAB**. (A) Representative SEM images of *A. baumannii* biofilm formed on urinary catheter (silicone) and endotracheal tube (PVC) in the presence of various concentrations of CRhAB. (B) Quantification of biomass in *A. baumannii* biofilm formed on a latex Foley urinary catheter upon incubating with CRhAB (0.5 mg/mL, 10 µM), 𝛼-amylase (5 mg/mL), and cellulase (5 mg/mL) over 3 days at 37 °C, n=6. (C) Corresponding CFU analysis, n=3. Error bars correspond to mean ± standard deviation (SD). One-way ANOVA with Dunnett’s post-hoc test to analyze the data. Statistical difference was denoted with asterisks, and ****, **, and * denote the *p*-value <0.0001, <0.01, and <0.05, respectively.


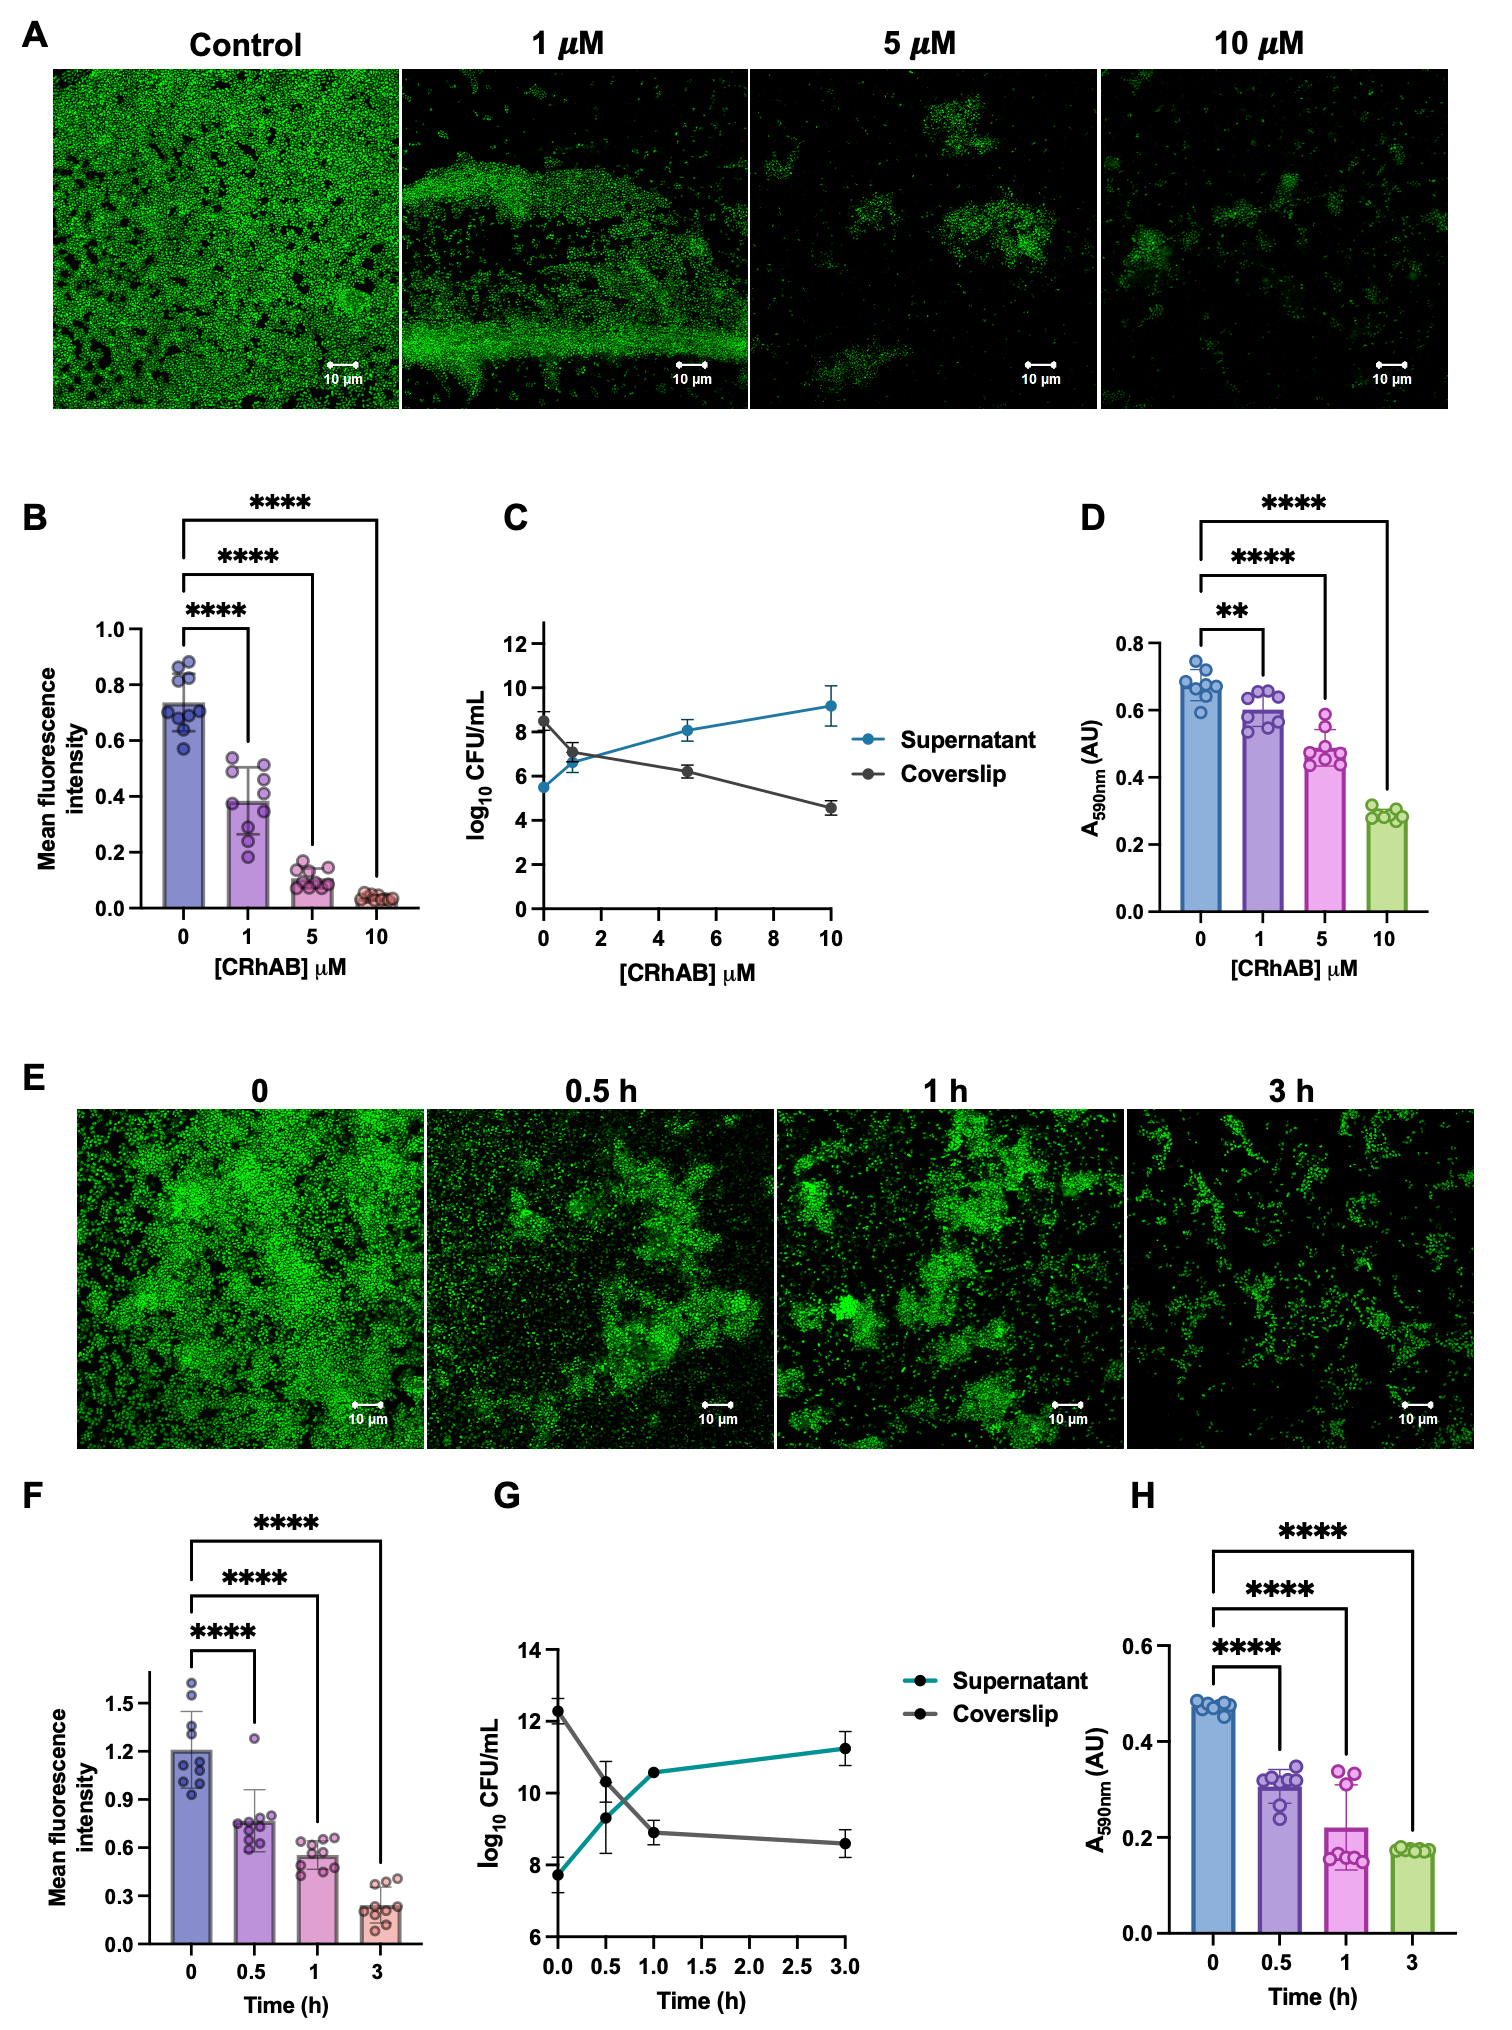


**Supplementary Figure 8.** **Concentration and time-dependent effect of CRhAB on the preformed 3-day-old *A. baumannii* biofilm. (A)** CLSM images of SYTO 9-stained *A. baumannii* biofilm post-treatment with different concentrations of CRhAB at 37 °C for 3 h. **(B)** Analysis of corresponding fluorescence intensity, five confocal images were analyzed from each of two biological replicates, n=5 and N = 2. **(C)** CFU in the supernatant and the remaining biofilm on the glass coverslip (n = 3). **(D)** Biomass quantification with crystal violet staining, n=8. **(E)** Dispersion of  *A. baumannii* biofilm as a function of time, post-treatment with CRhAB (10 𝝁M). **(F)**  Analysis of corresponding mean fluorescence intensity, five confocal images were analyzed from each of two biological replicates, n=5 and N = 2. **(G)** CFU in the supernatant and the remaining biofilm on the glass coverslip (n=3). **(H)** Biomass quantification with crystal violet staining, n=8. One-way ANOVA with Dunnett’s post-hoc test to analyze the experimental data. The error bar indicates the mean ± standard deviation. Statistical difference was denoted with asterisks, and ****, and ** denote the *p*-value <0.0001 and <0.01, respectively.

**
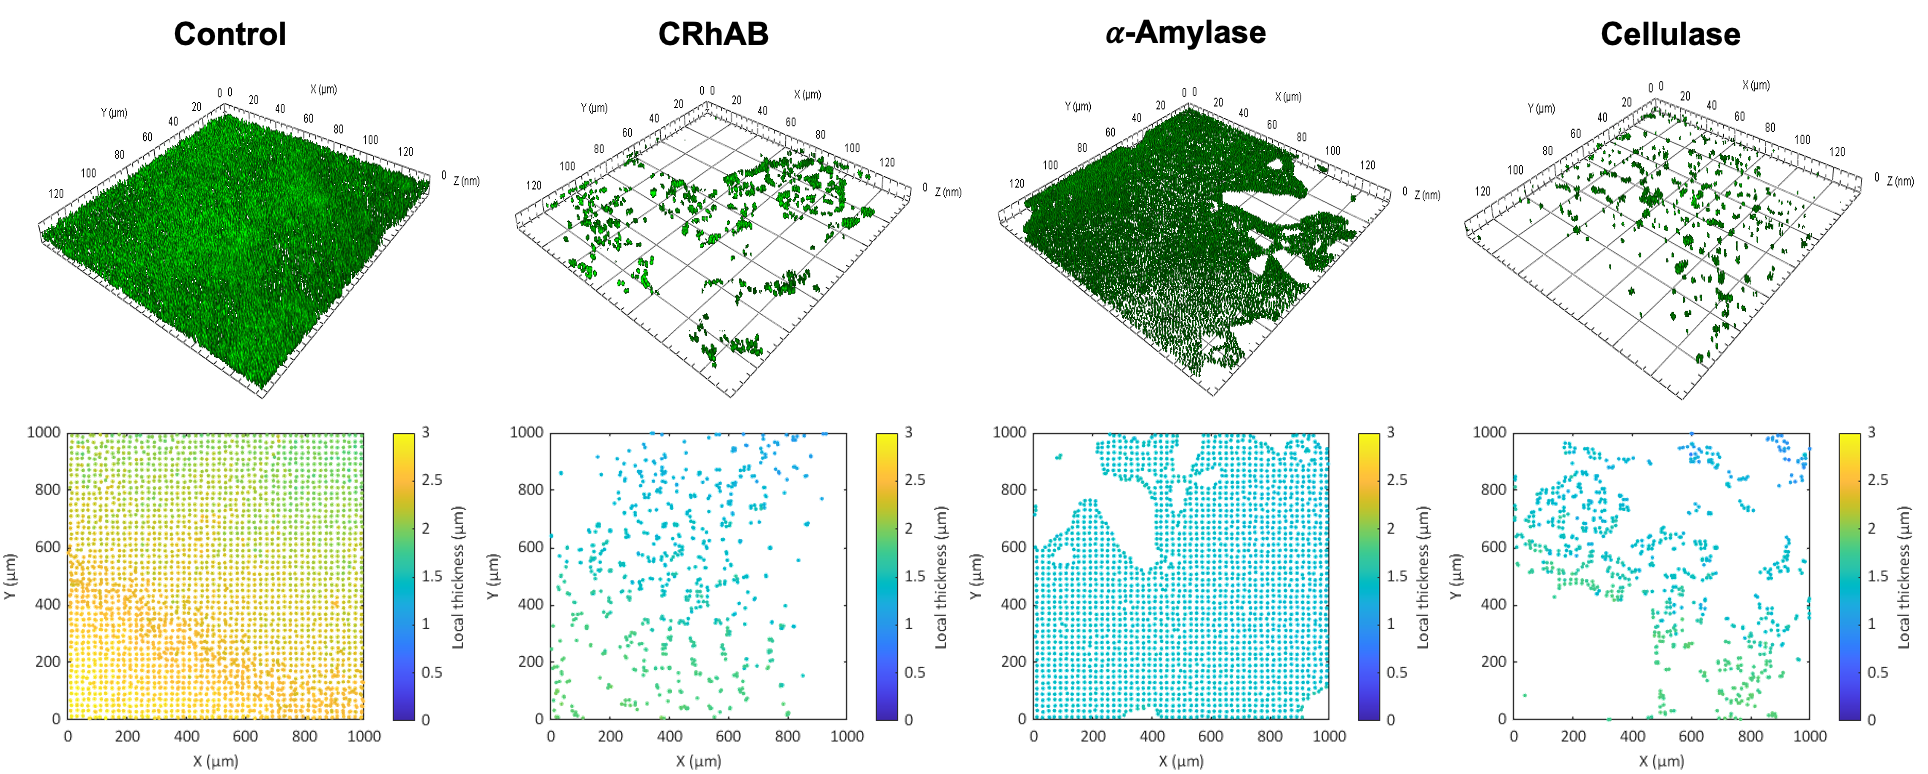
**

**Supplementary Figure 9.** CRhAB disrupts the preformed mature *A. baumannii* biofilm. 3D representative CLSM images of SYTO 9-stained 3-day-old *A. baumannii* biofilm post-treatment with CRhAB (0.5 mg/mL), 𝛼-amylase (5 mg/mL), and cellulase (5 mg/mL) for 2 h at 37 °C. Confocal z-stack images were analysed via BiofilmQ software, and the local biofilm thickness was represented as scattered colour to obtain a 2D+colour scattered plot.


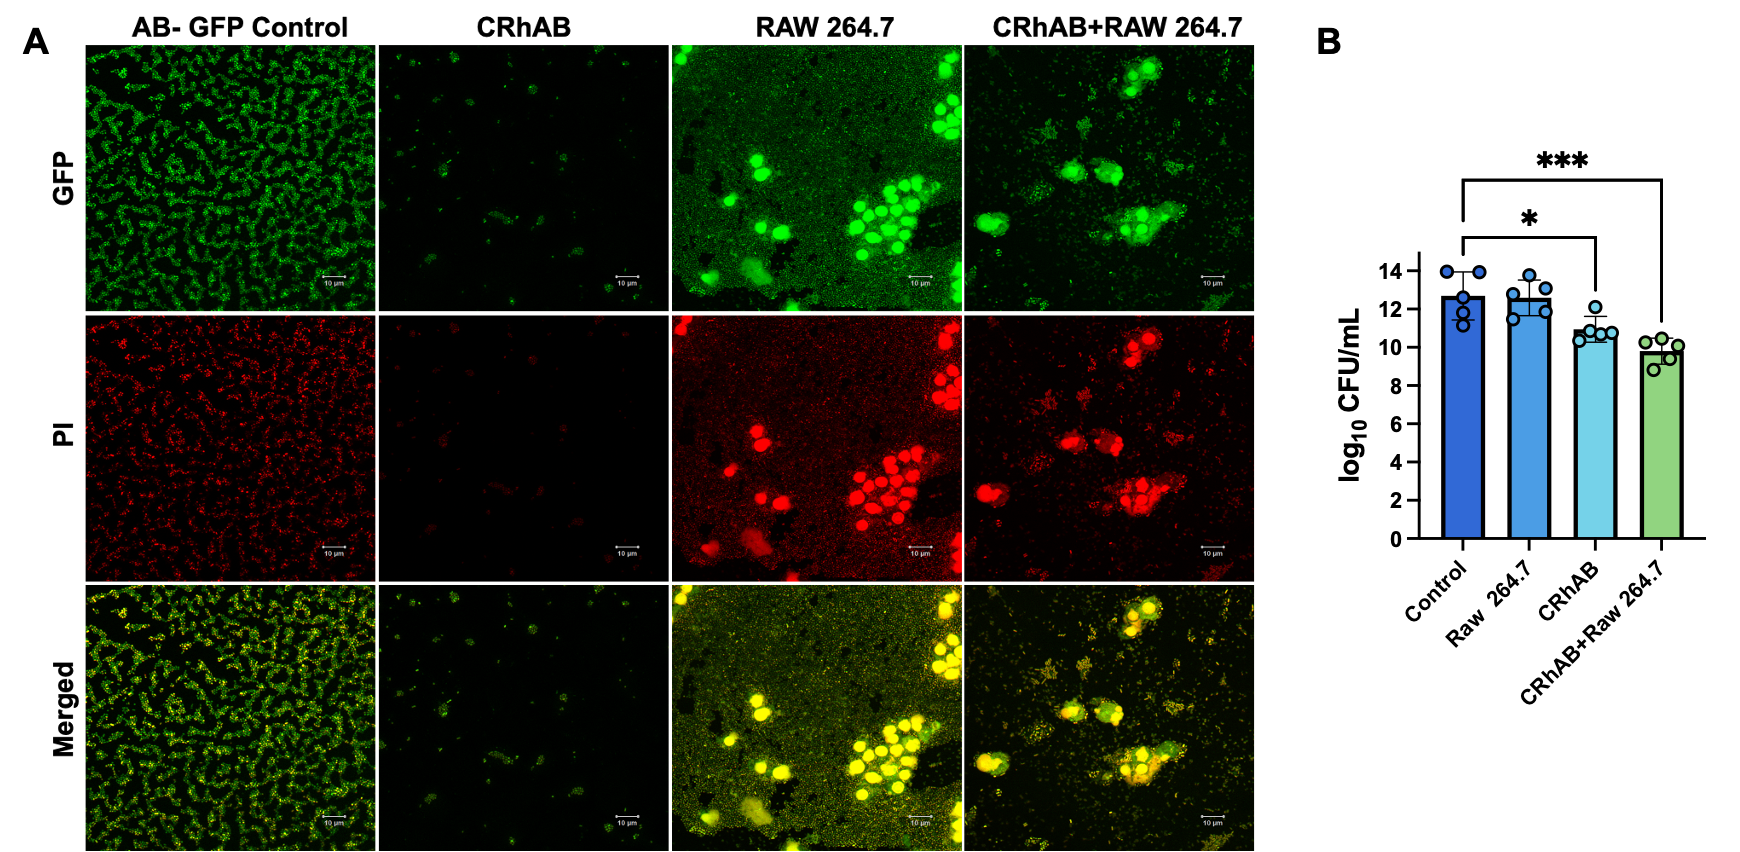


**Supplementary Figure 10.** **CRhAB-mediated potentiation of macrophages against biofilm-encased *A. baumannii* cells.** CRhAB disrupts the EPS matrix of *A. baumannii* biofilm, thereby enhancing the sensitivity of biofilm-encased *A. baumannii* cells to macrophages. The *A. baumannii* (GFP plasmid-containing) biofilm was grown for 3 days and subjected to treatment with CRhAB, RAW 264.7 cells, and 2 h CRhAB-treated samples were subjected to RAW 264.7 cells treatment for 18 h at 37 °C. **(A)** The corresponding representative CLSM images, scale bar: 10 µm. **(B)** Number of viable cells analysis using CFU. The error bar indicates the mean ± standard deviation of n = 5 data. One-way ANOVA with Dunnett’s post-hoc test to analyze the data. Statistical difference was denoted with asterisks, and *** and * denote the *p*-value <0.001 and <0.05, respectively.

**
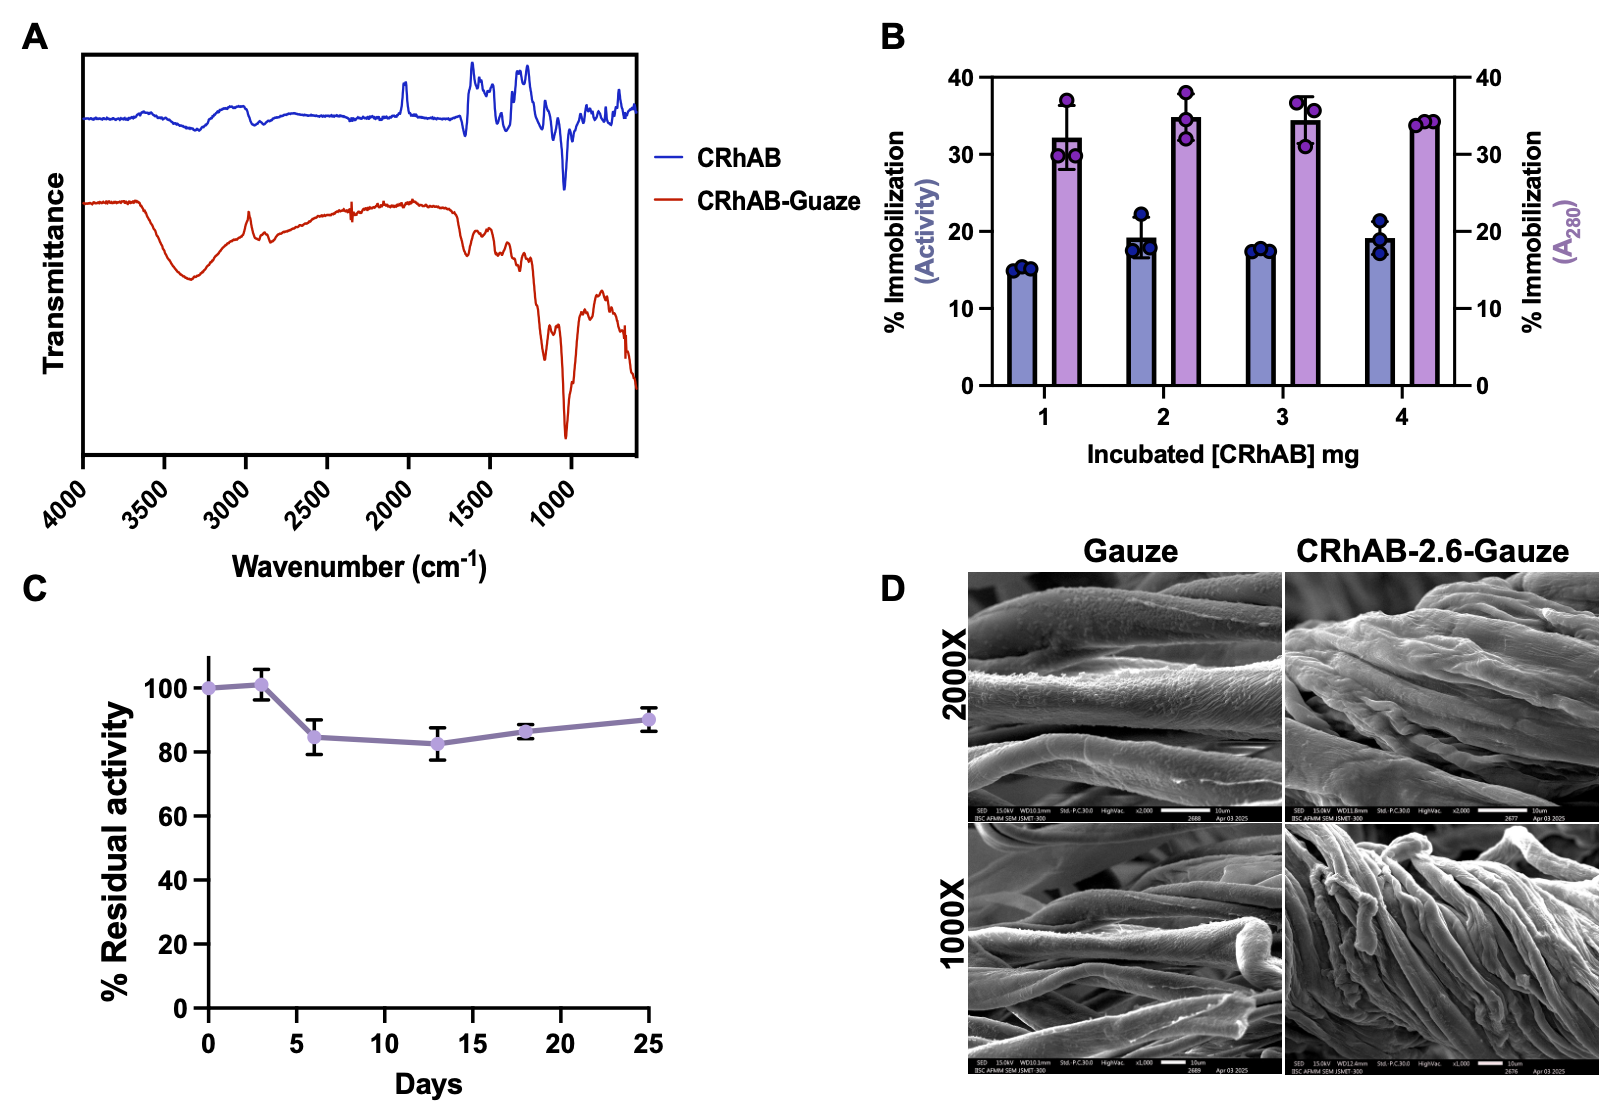
**

**Supplementary Figure 11.** Characterization of CRhAB-immobilized gauze. **(A)** FTIR spectra of CRhAB in buffer and CRhAB-immobilized gauze. **(B)** Quantification of CRhAB loading efficiency in medical gauze (per cm2 area). **(C)** Storage stability of CRhAB-immobilized gauze (air dried) at 4 °C, n=3. **(D)** SEM images of CRhAB-2.6-G, stored for 25 days at 4 °C, prevented *A. baumannii* colonization.

**
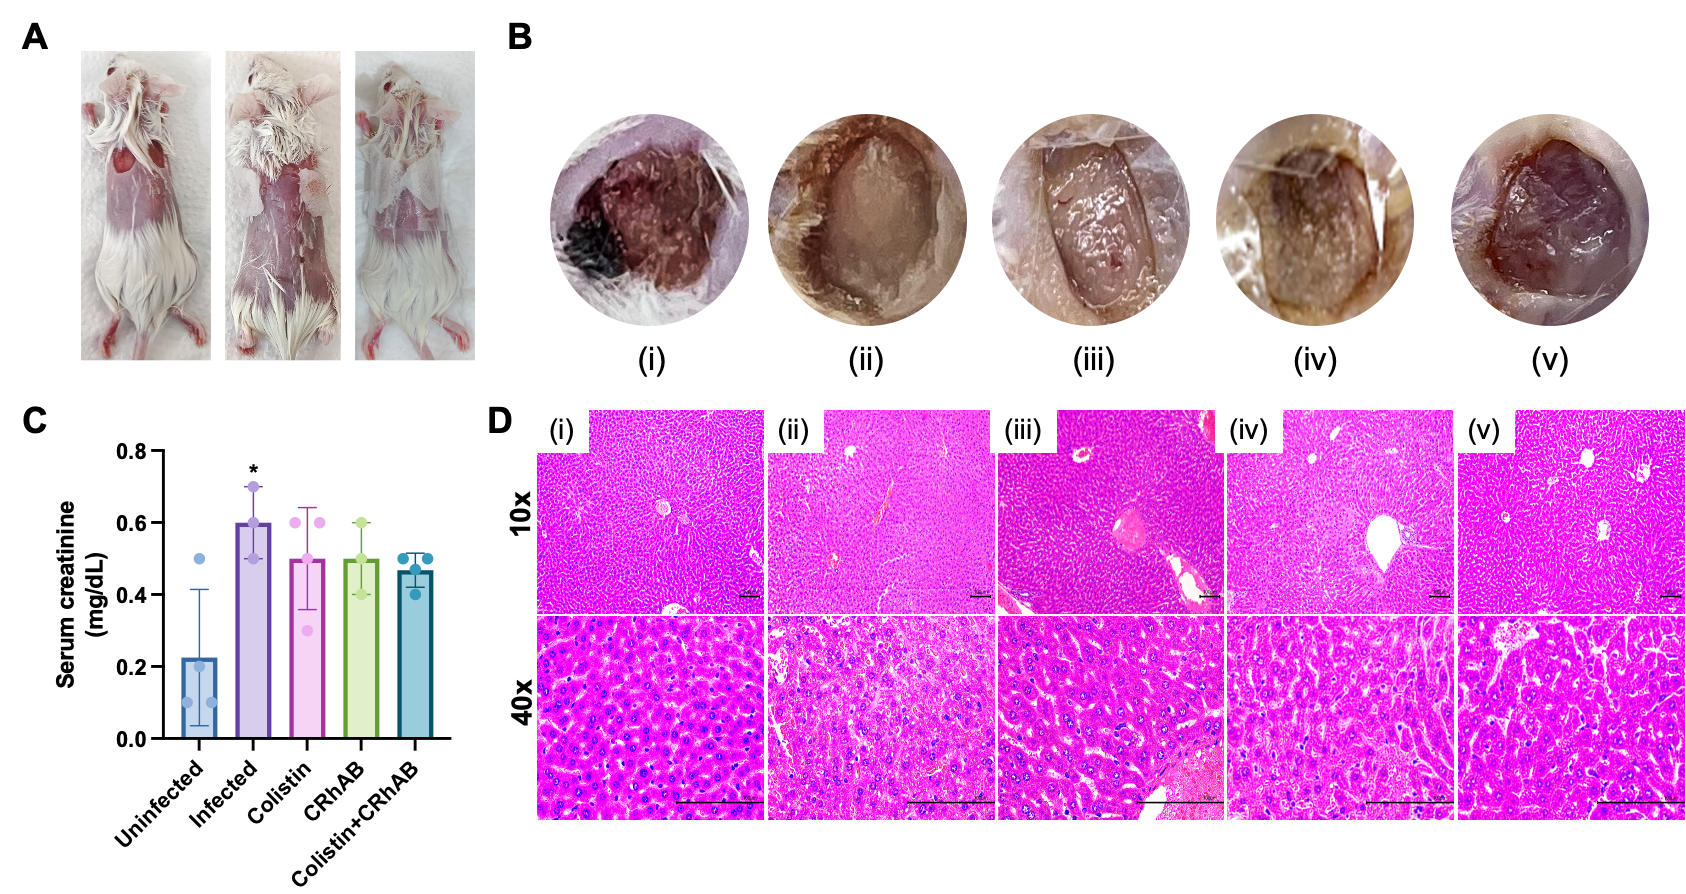
**

**Supplementary Figure 12. (A)** Representative image illustrating CRhAB-gauze application at the wound site. **(B)** Representative wound images on fourth day of different treatment groups; (i) uninfected wound tissue, (ii) *A. baumannii* infected wound tissue with regular gauze, (iii) infected wound with regular gauze and subcutaneously injected with colistin (20 mg/kg every 48 h), (iv) infected wound treated with CRhAB-immobilized gauze (2.6 mg/cm²), and (v) infected wound treated with both colistin (20 mg/kg every 48 h) and CRhAB-immobilized gauze (2.6 mg/cm²). **(C)** Serum creatinine levels and (D) H&E-stained liver tissue images (scale bar: 100 µm) of corresponding treatment groups.


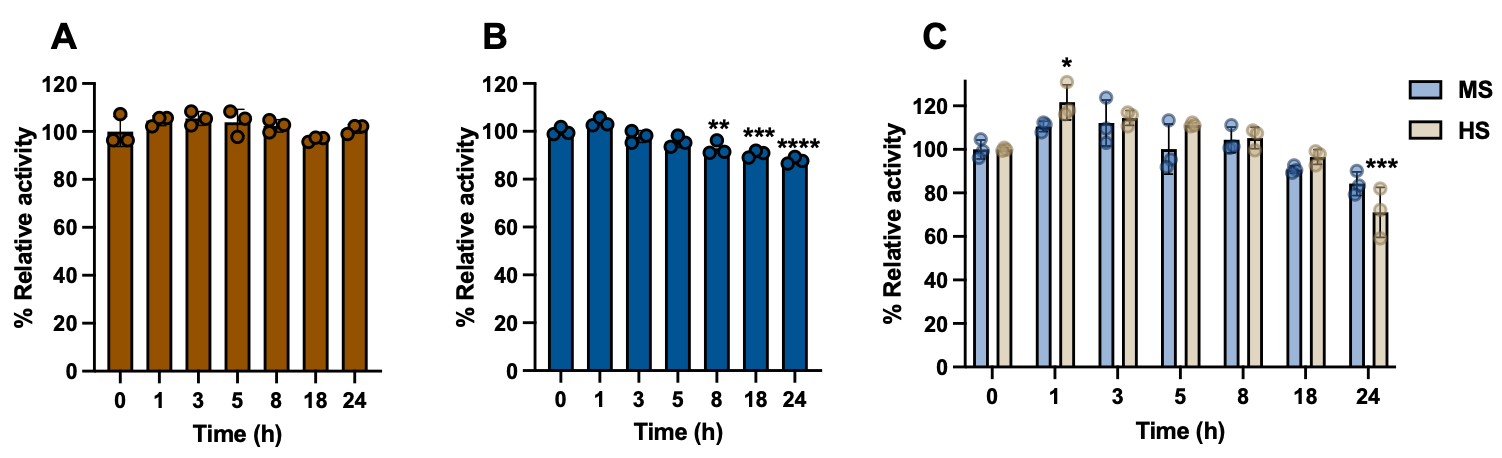


Supplementary Figure 13. Stability of CRhAB in (A) tryptic soy broth (TSB), (B) Dulbecco's Modified Eagle Medium with Fetal Bovine Serum (DMEM+10% FBS), (C) mouse blood serum (MS), and human blood serum (HS), n=3.

**Supplementary Table 1.** Kinetic parameters of CRhAB with different substrates. ND = no activity detected


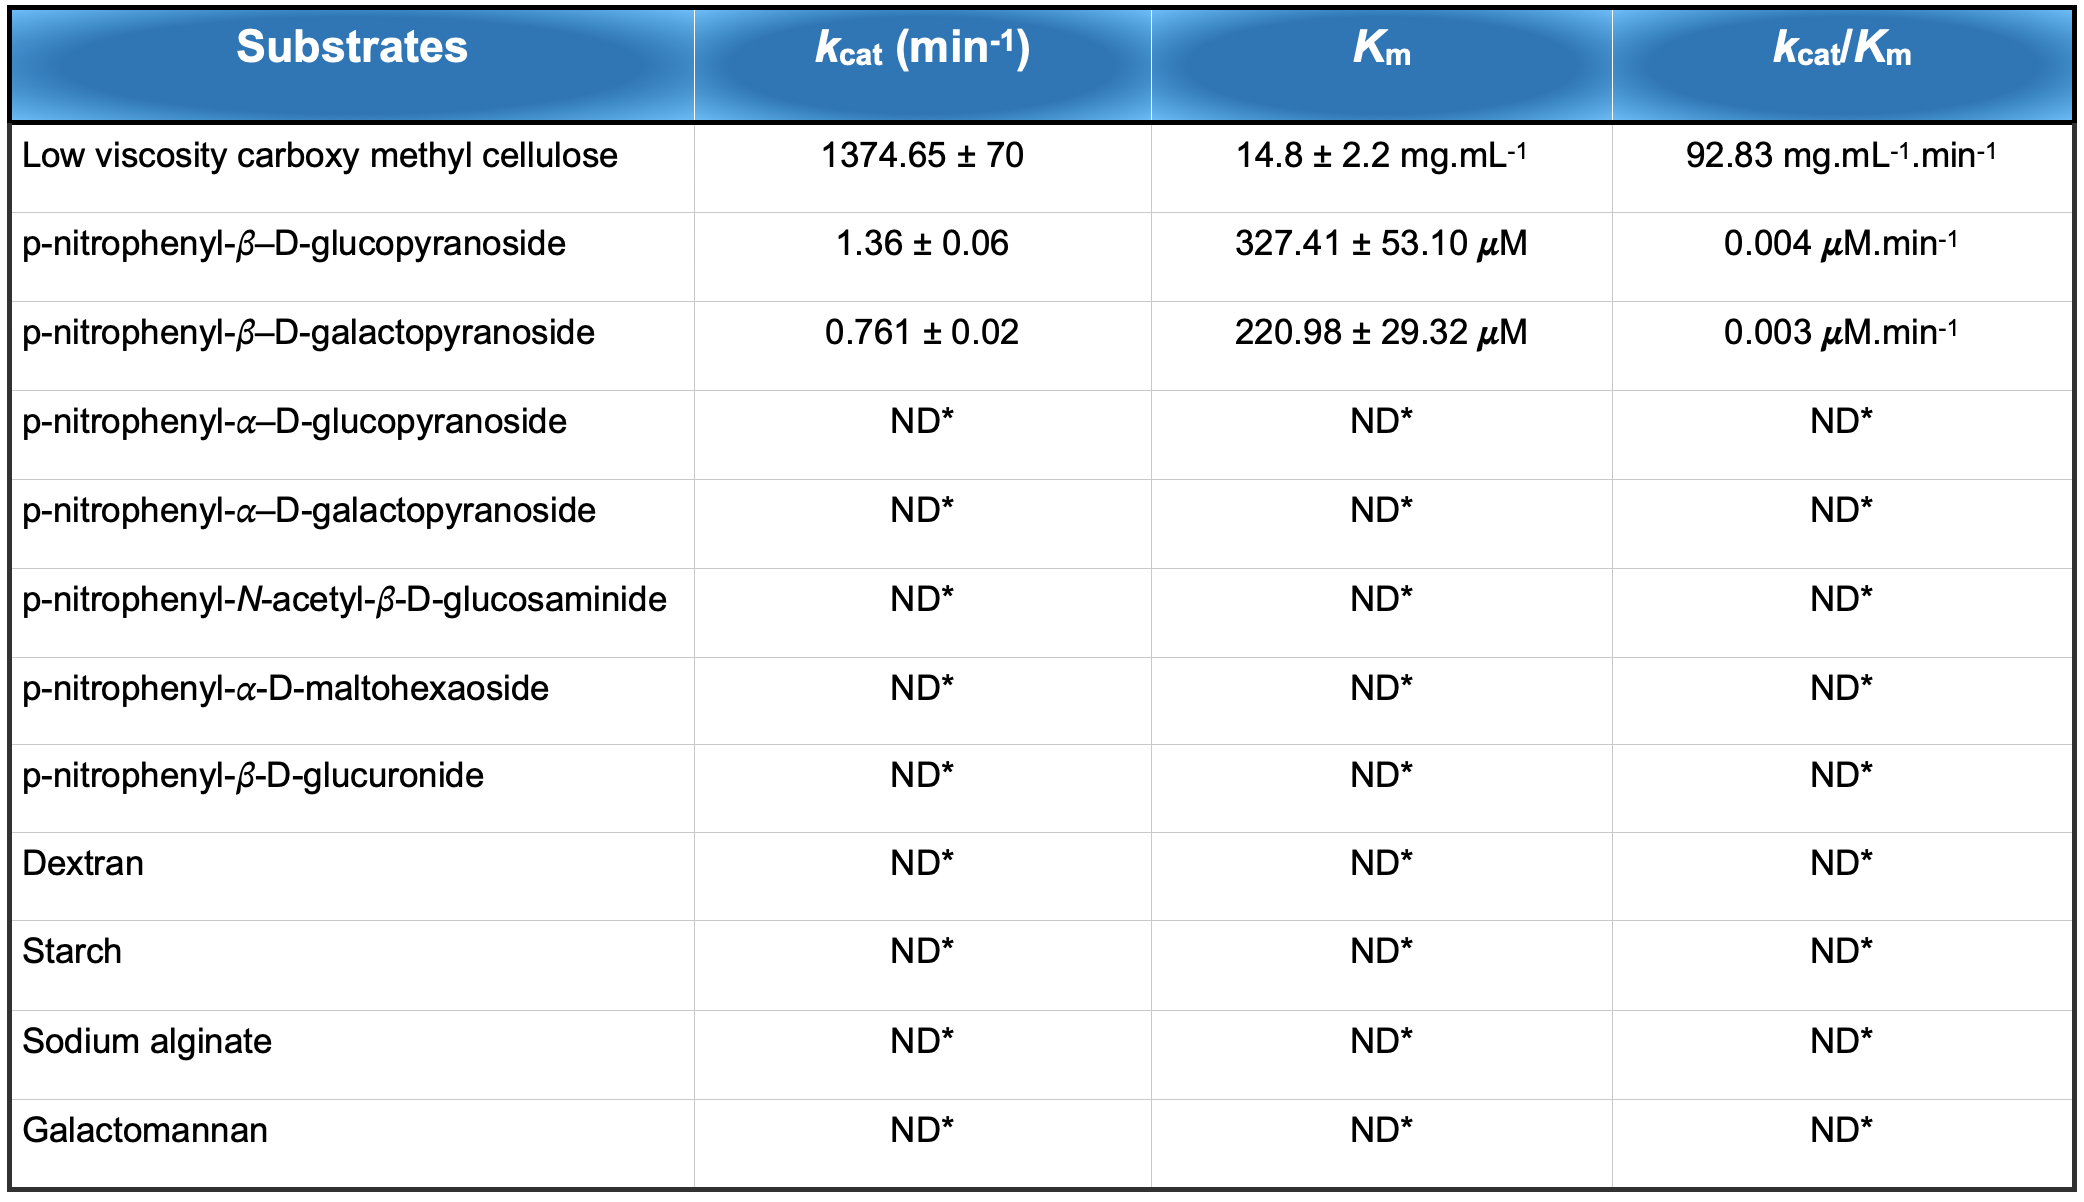


**Supplementary Table 2.** List of primers used for qRT-PCR analysis.


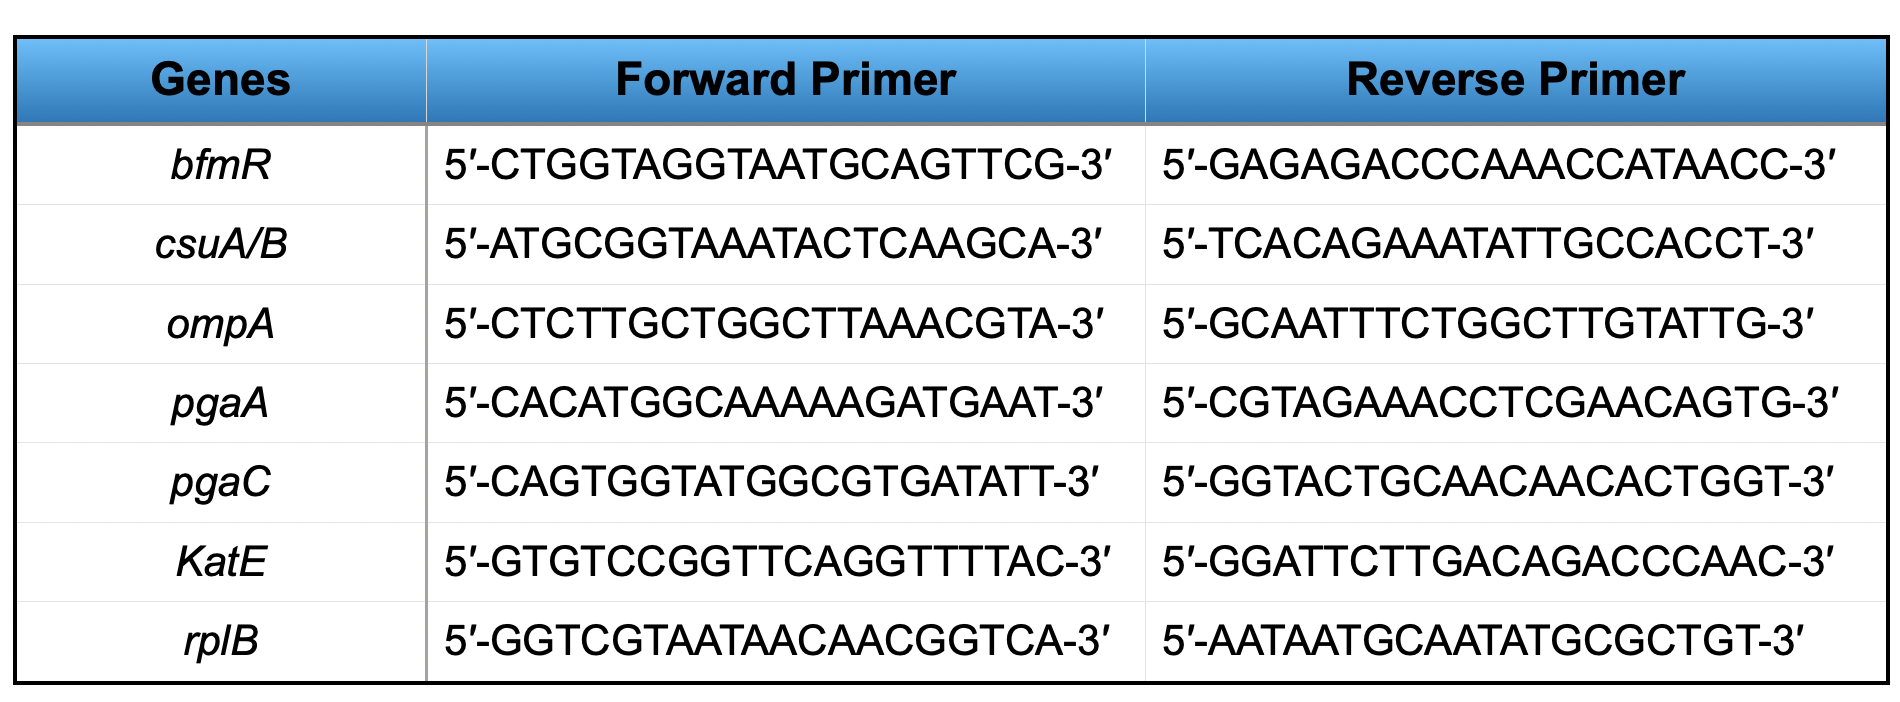

Supplement: Supplementary file 1 [file e95d1424f577d0a8faf63c00.docx]
